# Supplementary material
Source: Springer Nature journal article supplement (https://www.springermedizin.de/resource/supplementary/13098_2013_240_MOESM2_ESM.pdf/9670800)

**a****baseline active TGF- $\beta$  serum levels**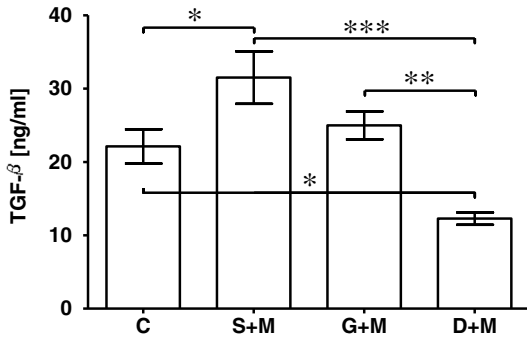**b****active TGF- $\beta$  serum levels**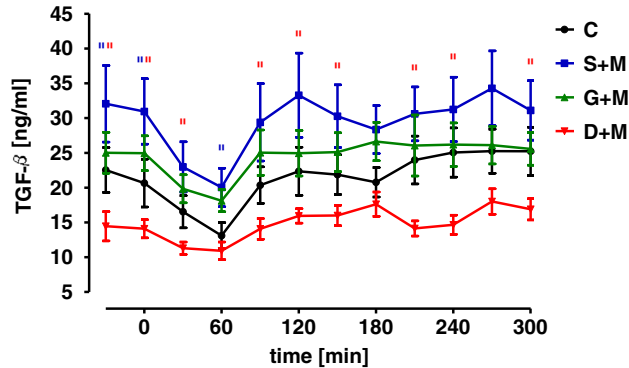

Supplement: MOESM2 [file 9670800]
